# Supplementary material
Source: Royal Society of Chemistry journal article supplement (doi:10.1039/d6nh00104a)
Supplement: d6nh00104a1.pdf [file d6nh00104a1.pdf]

**Supporting Information for  
Oxygen-driven doping of conjugated polymers in aqueous media via anion  
adsorption**

Shion Kaneko, Masaki Ishii, Kenichi Sakai, Hideki Sakai, Jun Takeya, Katsuhiko Ariga,  
and Yu Yamashita

Correspondence and requests for materials should be addressed to  
7221701@alumni.tus.ac.jp, YAMASHITA.Yu@nims.go.jp

**Contents**

1. Supplementary Methods and Discussion
  - 1.1 PBTTT film's thickness by AFM
  - 1.2 Ambient Stability of Doped PBTTT Films
  - 1.3 Effect of PBTTT Film Thickness on Doping Kinetics
  - 1.4 Structure of PBTTT film
  - 1.5 The effect of dissolved oxygen
  - 1.6 Applicability of Oxygen-Based Doping
  - 1.7 Anion adsorption on SAM film and PBTTT film
  - 1.8 pH dependence of doping level

## 1. Supplementary Methods and Discussion.

### 1.1 PBTTT film's thickness by AFM

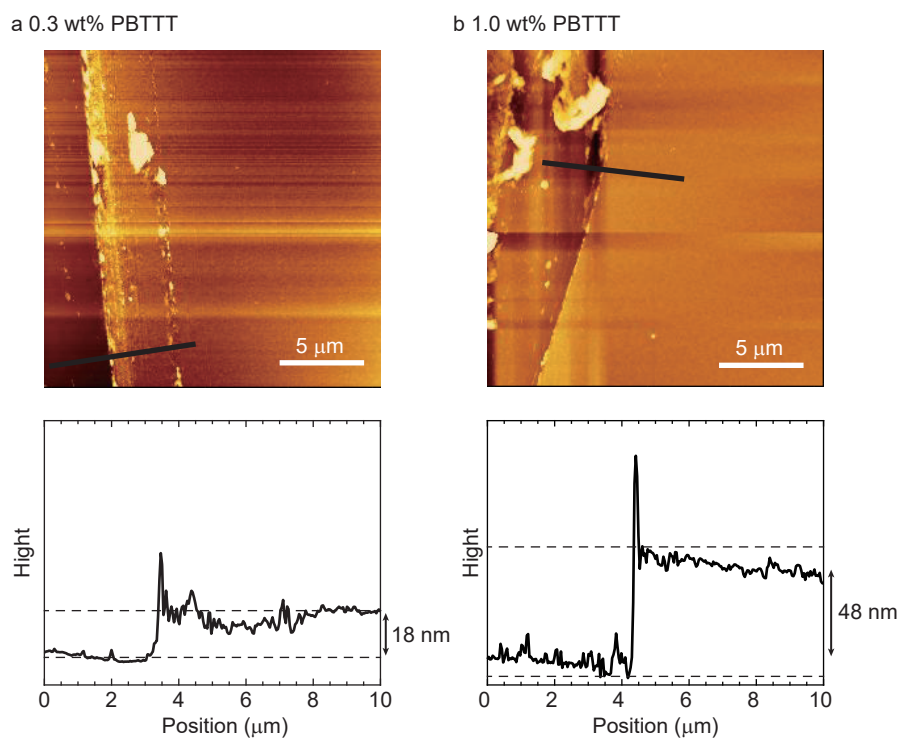

**Figure S1:** AFM topographic images ( $5 \mu\text{m} \times 5 \mu\text{m}$ ) and cross-sectional profiles of films prepared from (a) using 0.3 wt% and (b) using 1.0 wt% solution, used to determine the film thickness

## 1.2 Ambient Stability of Doped PBTTT Films

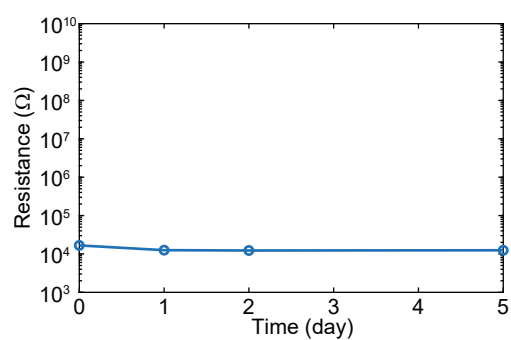

**Figure S2:** The ambient stability of our TFPB-doped PBTTT films was evaluated by monitoring changes in their electrical resistance under ambient conditions. A PBTTT thin film coated from a 0.3 wt% solution was used.

### 1.3 Effect of PBTTT Film Thickness on Doping Kinetics

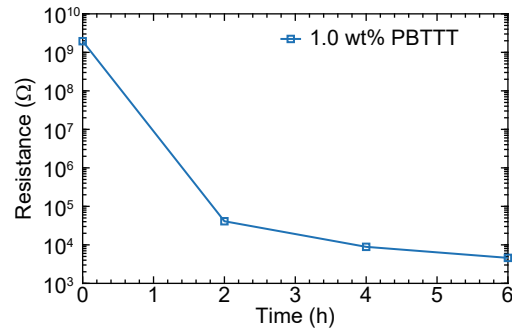

**Figure S3:** Doping progression in a thin film coated from a 1 wt% solution.

### 1.4 Structure of PBTTT film

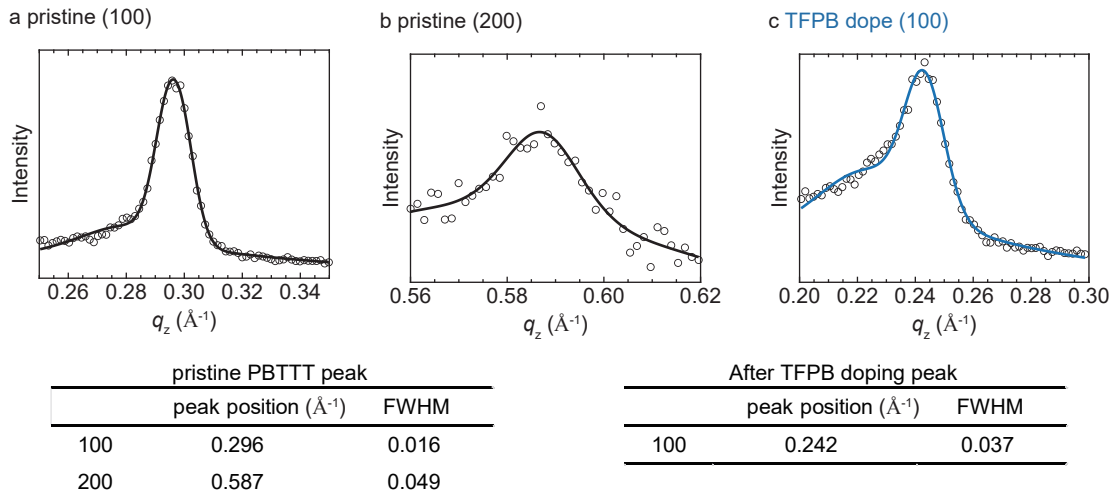

**Figure S4:** XRD spectra of (a, b) pristine PBTTT thin films and (c) PBTTT thin films immersed in a pH 2 aqueous solution containing LiTFPB.

### 1.5 The effect of dissolved oxygen

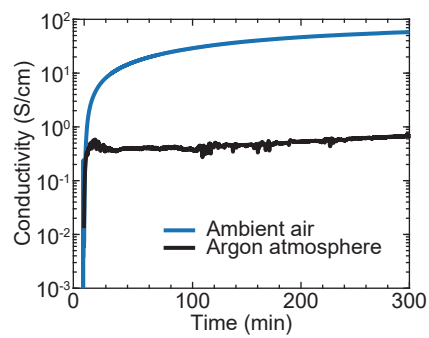

**Figure S5:** Continuous conductivity measurements under argon and ambient conditions to reveal the effect of dissolved oxygen.

## 1.6 Applicability of Oxygen-Driven Doping

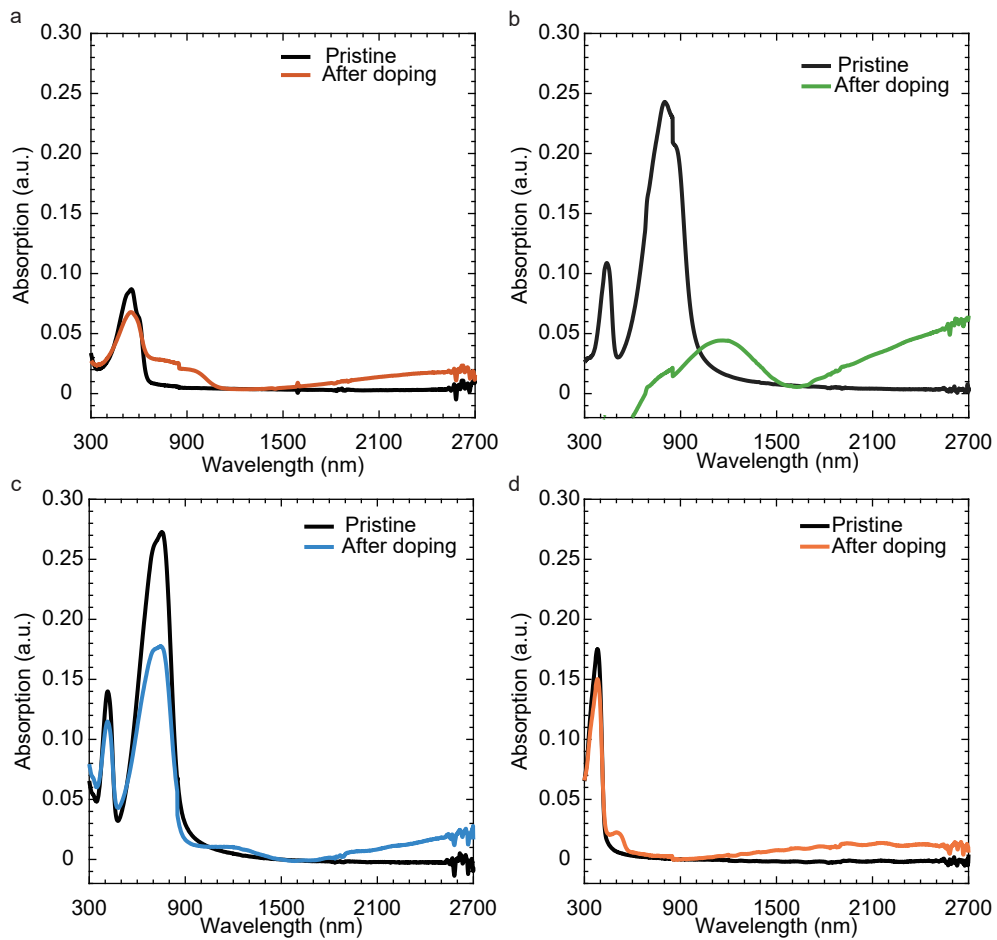

**Figure S6:** Optical absorption changes of each semiconducting polymer before and after oxygen-based doping. (a) Poly(3-hexylthiophene-2,5-diyl) (P3HT) (b) Poly(cyclopentadithiophene-benzothiadiazole) (CDT-BTZ) (c) Poly(4-octyl triphenylamine) (poly-TPD-C8) (d) Poly[2,6-(4,4-bis(2-ethylhexyl)-4*H*-cyclopenta[2,1-*b*:3,4-*b'*]dithiophene)-*alt*-4,7-(2,1,3-benzothiadiazole)] (PCPDTBT)

## 1.7 Anion adsorption on SAM film and PBTTT film

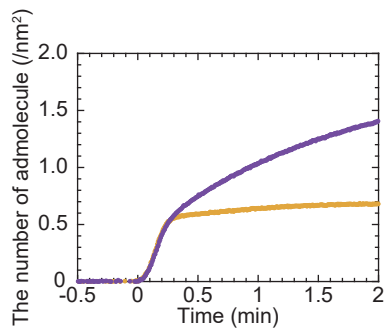

**Figure S7:** Logarithmic-scale plot of the mass change difference between SAM and PBTTT films, clarifying the distinction between surface adsorption and anion incorporation into the PBTTT bulk.

## 1.8 pH dependence of doping level

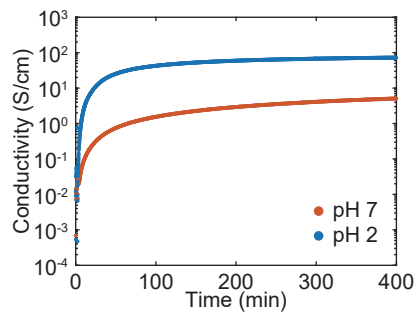

**Figure S8:** Continuous measurement of conductivity under different pH conditions in our method.
